# Supplementary material for: γ-Radiation effect on Th4+ extraction behaviour of TODGA/[C2mim][NTf2]: identification and extractability study of radiolytic products
Source: Royal Society of Chemistry journal article supplement (doi:10.1039/c5ra25364k), 2016-01-01
Supplement: c5ra25364k1.pdf [file c5ra25364k1.pdf]

## Supporting Information

### $\gamma$ -radiation effect on Th<sup>4+</sup> extraction behaviour of TODGA/[C<sub>2</sub>mim][NTf<sub>2</sub>]: identification and extractability study of radiolytic products

Weijin Yuan,<sup>a†</sup> Congzhi Wang,<sup>b†</sup> Yinyong Ao,<sup>c</sup> Long Zhao,<sup>a\*</sup> Weiqun Shi,<sup>b\*</sup> Maolin Zhai<sup>c</sup>

<sup>a</sup> School of Nuclear Science and Engineering, Shanghai Jiao Tong University, Shanghai 200240, P. R. China

<sup>b</sup> Laboratory of Nuclear Energy Chemistry and Key Laboratory for Biomedical Effects of Nanomaterials and Nanosafety, Institute of High Energy Physics, Chinese Academy of Sciences, Beijing 100049, China.

<sup>c</sup> Beijing National Laboratory for Molecular Sciences, Radiochemistry and Radiation Chemistry Key Laboratory for Fundamental Science, College of Chemistry and Molecular Engineering, Peking University, Beijing 100871, China

\*Corresponding authors: E-mail: ryuuchou@sjtu.edu.cn; E-mail: shiwq@ihep.ac.cn

#### Page No. Contents

|       |                                                                                                                                     |
|-------|-------------------------------------------------------------------------------------------------------------------------------------|
| S – 3 | Characterization part                                                                                                               |
| S – 5 | Table S1. UPLC mobile phases and gradient elution details                                                                           |
| S – 6 | Table S2. $\gamma$ -radiation effect on $E_{Th}$ of TODGA extraction system                                                         |
| S – 7 | Table S3. The concentration of TODGA dissolved in [C <sub>2</sub> mim][NTf <sub>2</sub> ] (a) and in dodecane (b) after irradiated. |
| S – 8 | Table S4. Theoretical Cartesian coordinates (in Å) for the structure of                                                             |

$[\text{Th}(\text{TMDGA})_3]^{4+}$  in the gas-phase using the B3LYP method.

**S – 12** Table S5. Theoretical Cartesian coordinates (in Å) for the structure of  $[\text{Th}(\text{TMDGA}-\text{C2mim})_3]^{5+}$  in the gas-phase using the B3LYP method.

**S – 17** Fig.S1 XPS spectra of the sediment (a) and  $\text{Th}(\text{SO}_3)_2$  (b).

**S – 18** Fig.S2 UPLC/Q-TOF-MS spectra of TODGA/dodecane before (A) and after irradiation (B).

**S – 19** Fig.S3 The area of extracted-ion peak of DOAA measured by UPLC/Q-TOF-MS

**S – 20** Fig.S4 Extraction of  $\text{Th}^{4+}$  using irradiated TODGA/dodecane (a) or unirradiated samples (b). ([TODGA] in irradiated TODGA/dodecane was detected by UPLC-Q-TOF-MS)

## Characterization part

**XPS analysis:**the sediment, which appeared after extraction, was collected after centrifuging and purification. The X-ray photoelectron spectra (XPS) of the sediment was recorded by an AXIS-Ultra instrument from Kratos Analytical using monochromatic Al K $\alpha$  radiation and low energy electron flooding for charge compensation.

**Quantitative/semi-quantitative analysis using UPLC-Q-TOF-MS:**An equal volume of irradiated/unirradiated sample was added to 2 mL acetonitrile, followed by mixing for 10 min. The supernatant was obtained by centrifugation at 12,000 rpm for 10 min and was directly used for UPLC-Q-TOF-MS (Waters Micromass Q-TOF Premier mass spectrometer). UPLC was performed at 45 °C using an Acquity UPLC BEH C<sub>18</sub> column (100 mm  $\times$  2.1 mm, i.d.: 1.7  $\mu$ m; Waters, Milford, USA), equipped with an Acquity UPLC VanGuard precolumn (5 mm  $\times$  2.1 mm, i.d.: 1.7  $\mu$ m; Waters). The elution gradient used has been shown in Table S1. The flow rate was 0.4 mL min<sup>-1</sup> and the injection volume was 2  $\mu$ L. MS condition: capillary potential 3.0 kV; sampling cone potential 35.0 V; desolvation gas flow 600.0 L·h<sup>-1</sup>; collision energy 6.0 eV; scan range m/z 100-2000; scan time 0.3 s; inter-scan time 0.02 s.

**MALDI-FTMS:** Matrix Assisted Laser Desorption Ionization/ Fourier Transform Mass spectrometry (MALDI-FTMS) measurements were recorded in positive mode. Experiments were conducted using a 7.0 T Solarix FTMS system equipped with a dual ESI-MALDI source (Bruker Daltonics). The intensity of MALDI-laser irradiation was 15% with frequency at 1000 Hz. The sample was diluted with acetonitrile by 5 times, 100 mg·mL<sup>-1</sup> of 2,5-dihydroxybenzoic acid matrix was prepared in 50% acetonitrile in water (0.1% Trifluoroacetic acid), and mixed at the ratio of 3:1 with sample, 1  $\mu$ L of mixture was

deposited on the stainless steel target and dried to produce a thinfilm of homogeneous crystals. The mass range (m/z)was from 80 to 1000.

Table S1.UPLC mobile phases and gradient elution details

| Time(min) | Solvent A<br>(0.2% aqueous formic acid) (%) | Solvent B<br>(0.2% aqueous acetonitrile) (%) |
|-----------|---------------------------------------------|----------------------------------------------|
| 0         | 95                                          | 5                                            |
| 0.2       | 95                                          | 5                                            |
| 2.2       | 75                                          | 25                                           |
| 4.5       | 70                                          | 30                                           |
| 6.0       | 60                                          | 40                                           |
| 12.0      | 1                                           | 99                                           |
| 15.5      | 1                                           | 99                                           |
| 16.5      | 95                                          | 5                                            |
| 19.0      | 95                                          | 5                                            |

Table S2.  $\gamma$ -radiation effect on  $E_{Th}$  of TODGA extraction system

| Dose(kGy) | $E_{Th}$                  |                         |                        |
|-----------|---------------------------|-------------------------|------------------------|
|           | (a) TODGA/[C2mim][NTf2]   | (b) TODGA/[C2mim][NTf2] | (c) TODGA/dodecan      |
|           | [HNO <sub>3</sub> ]=0.01M | [HNO <sub>3</sub> ]=3M  | [HNO <sub>3</sub> ]=3M |
| 0         | 99.4                      | 88.7                    | 93.0                   |
| 100       | 98.8                      | 89.9                    | 89.5                   |
| 200       | 99.2                      | 84.7                    | 87.3                   |
| 300       | 98.6                      | 84.5                    | 80.2                   |
| 400       | 98.9                      | 79.4                    | 60.4                   |
| 500       | 98.5                      | 73.4                    | 54.3                   |
| 800       | 98.5                      | 59.1                    | 21.9                   |
| 1000      | 98.6                      | 54.0                    | 16.3                   |

Table S3. The concentration of TODGA dissolved in [C<sub>2</sub>mim][NTf<sub>2</sub>] (a) and in dodecane (b) after irradiated.

| Dose (kGy) | (a) [TODGA] in [C <sub>2</sub> mim][NTf <sub>2</sub> ] | (b) [TODGA] in dodecane |
|------------|--------------------------------------------------------|-------------------------|
|            | mmol·L <sup>-1</sup>                                   | mmol·L <sup>-1</sup>    |
| 0          | 10.00                                                  | 10.00                   |
| 10         | 9.43                                                   | -                       |
| 20         | 9.39                                                   | 9.52791                 |
| 30         | 8.81                                                   | -                       |
| 50         | -                                                      | 9.35511                 |
| 80         | -                                                      | 8.76592                 |
| 100        | 7.94                                                   | 8.58093                 |
| 200        | 6.88                                                   | 7.48093                 |
| 300        | 5.93                                                   | 6.99342                 |
| 400        | 5.20                                                   | 5.86319                 |
| 500        | 4.51                                                   | 5.22512                 |
| 800        | 3.01481                                                | 2.74654                 |
| 1000       | 2.1                                                    | 1.78                    |

-.not measured

Table S4. Theoretical Cartesian coordinates (in Å) for the structure of [Th(TMDGA)<sub>3</sub>]<sup>4+</sup> in the gas-phase using the B3LYPmethod.

| Standard orientation: |                         |           |           |
|-----------------------|-------------------------|-----------|-----------|
| Atomic Number         | Coordinates (Angstroms) |           |           |
|                       | X                       | Y         | Z         |
| 6                     | -2.158713               | 0.033555  | 0.044631  |
| 6                     | -1.023172               | 0.973812  | -0.353326 |
| 1                     | -0.630939               | 1.510591  | 0.519403  |
| 1                     | -1.363740               | 1.708785  | -1.094015 |
| 6                     | 1.149625                | 0.892662  | -1.350550 |
| 6                     | 2.130606                | -0.125746 | -1.927160 |
| 1                     | 0.855116                | 1.629593  | -2.107940 |
| 1                     | 1.591895                | 1.423108  | -0.497360 |
| 8                     | 0.002748                | 0.152785  | -0.920394 |
| 8                     | -2.005820               | -1.206163 | -0.227195 |
| 8                     | 1.791747                | -1.356921 | -1.865400 |
| 6                     | -3.444520               | 1.940420  | 0.949743  |
| 1                     | -2.656350               | 2.568574  | 0.538030  |
| 1                     | -3.482005               | 2.073360  | 2.034956  |
| 6                     | -4.337858               | -0.371969 | 1.056713  |
| 1                     | -4.058791               | -1.410604 | 0.897649  |
| 1                     | -5.232978               | -0.126588 | 0.477466  |
| 7                     | -3.232922               | 0.511489  | 0.639889  |
| 6                     | 3.692203                | 1.694550  | -2.524044 |
| 1                     | 4.694601                | 1.779376  | -2.095765 |
| 1                     | 3.022213                | 2.349649  | -1.969674 |
| 6                     | 4.225620                | -0.672079 | -3.045459 |
| 1                     | 4.471664                | -0.341389 | -4.058135 |
| 1                     | 3.785201                | -1.665616 | -3.076309 |



---

|   |           |           |           |
|---|-----------|-----------|-----------|
| 7 | 3.266618  | 0.281285  | -2.456856 |
| 1 | -4.400684 | 2.254902  | 0.522584  |
| 1 | -4.544917 | -0.199134 | 2.116291  |
| 1 | 5.140233  | -0.680712 | -2.445049 |
| 1 | 3.727229  | 2.013574  | -3.569946 |
| 6 | -1.932243 | -2.087784 | -4.068594 |
| 6 | -2.851436 | -3.204234 | -3.578268 |
| 1 | -2.838552 | -4.057515 | -4.267849 |
| 1 | -3.885019 | -2.847856 | -3.480341 |
| 6 | -3.114476 | -4.658277 | -1.697274 |
| 6 | -2.459912 | -4.950462 | -0.349229 |
| 1 | -4.1562   | -4.338776 | -1.570052 |
| 1 | -3.095807 | -5.545909 | -2.342891 |
| 8 | -2.353407 | -3.605757 | -2.298103 |
| 8 | -0.994919 | -1.721174 | -3.280285 |
| 8 | -1.40028  | -4.293968 | -0.065107 |
| 6 | -3.207715 | -1.94254  | -6.180235 |
| 1 | -3.914554 | -2.626394 | -5.713086 |
| 1 | -2.774929 | -2.417837 | -7.065535 |
| 6 | -1.240114 | -0.486624 | -5.76965  |
| 1 | -0.397158 | -0.352055 | -5.096326 |
| 1 | -1.808536 | 0.444091  | -5.857221 |
| 7 | -2.124391 | -1.549214 | -5.25583  |
| 6 | -4.203002 | -6.629515 | 0.15025   |
| 1 | -3.989036 | -7.687441 | 0.323936  |
| 1 | -4.515178 | -6.506337 | -0.885614 |
| 6 | -2.39812  | -6.132784 | 1.780234  |
| 1 | -3.181407 | -6.055595 | 2.539054  |
| 1 | -1.605143 | -5.41964  | 1.991553  |
| 7 | -2.989534 | -5.845332 | 0.460078  |

---

---

|   |           |           |           |
|---|-----------|-----------|-----------|
| 1 | -3.747244 | -1.043705 | -6.490604 |
| 1 | -0.882865 | -0.776757 | -6.7614   |
| 1 | -2.002436 | -7.152836 | 1.783794  |
| 1 | -5.015706 | -6.320229 | 0.814316  |
| 6 | 1.545639  | -2.830159 | 1.781242  |
| 6 | 2.309769  | -3.960943 | 1.096096  |
| 1 | 2.182401  | -4.90797  | 1.635081  |
| 1 | 3.381606  | -3.731126 | 1.038316  |
| 6 | 2.388838  | -5.099435 | -1.005589 |
| 6 | 1.704774  | -5.076528 | -2.370432 |
| 1 | 3.462762  | -4.895548 | -1.098945 |
| 1 | 2.257591  | -6.073356 | -0.516597 |
| 8 | 1.766345  | -4.075754 | -0.222854 |
| 8 | 0.674943  | -2.21085  | 1.079244  |
| 8 | 0.747026  | -4.243922 | -2.524345 |
| 6 | 2.815125  | -3.212543 | 3.866984  |
| 1 | 3.407584  | -3.91798  | 3.286752  |
| 1 | 2.320689  | -3.743752 | 4.685585  |
| 6 | 1.06075   | -1.462528 | 3.738577  |
| 1 | 0.243244  | -1.110498 | 3.114249  |
| 1 | 1.746386  | -0.640679 | 3.965747  |
| 7 | 1.797485  | -2.532174 | 3.039982  |
| 6 | 3.200076  | -6.875581 | -3.168522 |
| 1 | 2.829038  | -7.860772 | -3.463933 |
| 1 | 3.555911  | -6.932551 | -2.14112  |
| 6 | 1.484406  | -5.880894 | -4.659969 |
| 1 | 2.270727  | -5.785528 | -5.413535 |
| 1 | 0.793286  | -5.045131 | -4.736969 |
| 7 | 2.108893  | -5.891566 | -3.323892 |
| 1 | 3.485568  | -2.459032 | 4.28937   |

---

---

|    |           |           |           |
|----|-----------|-----------|-----------|
| 1  | 0.667506  | -1.86338  | 4.676633  |
| 1  | 0.956361  | -6.825965 | -4.818561 |
| 1  | 4.031487  | -6.600348 | -3.824142 |
| 90 | -0.198919 | -2.507348 | -1.146637 |

---

Table S5. Theoretical Cartesian coordinates (in Å) for the structure of  $[\text{Th}(\text{TMDGA}/\text{C}2\text{mim})_3]^{5+}$  in the gas-phase using the B3LYP method.

| Standard orientation: |                         |           |           |
|-----------------------|-------------------------|-----------|-----------|
| AtomicNumber          | Coordinates (Angstroms) |           |           |
|                       | X                       | Y         | Z         |
| 6                     | -2.054750               | 0.044520  | 0.631023  |
| 6                     | -1.002391               | 0.990792  | 0.063373  |
| 1                     | -0.555866               | 1.607989  | 0.848150  |
| 1                     | -1.468917               | 1.653418  | -0.683165 |
| 6                     | 1.072537                | 0.923464  | -1.286080 |
| 6                     | 1.822673                | -0.200411 | -2.011305 |
| 1                     | 0.598279                | 1.557082  | -2.042703 |
| 8                     | -0.008877               | 0.176361  | -0.567622 |
| 8                     | -2.061646               | -1.157299 | 0.205580  |
| 8                     | 1.632707                | -1.415356 | -1.623082 |
| 6                     | -2.995868               | 1.902561  | 1.964731  |
| 1                     | -2.568582               | 2.583416  | 1.228716  |
| 1                     | -2.473968               | 2.011063  | 2.921352  |
| 6                     | -3.947916               | -0.388762 | 2.108994  |
| 1                     | -3.726041               | -1.421285 | 1.849320  |
| 1                     | -4.945226               | -0.117639 | 1.749242  |
| 7                     | -2.943881               | 0.501716  | 1.502647  |
| 6                     | 2.940185                | 1.456337  | -3.487007 |
| 1                     | 3.917736                | 1.477492  | -3.972849 |
| 1                     | 2.961494                | 2.174902  | -2.666955 |
| 6                     | 3.363773                | -0.970542 | -3.748980 |
| 1                     | 3.101349                | -0.889241 | -4.810228 |
| 1                     | 3.056257                | -1.940255 | -3.364900 |
| 7                     | 2.693076                | 0.094247  | -2.992456 |

---

|   |           |           |           |
|---|-----------|-----------|-----------|
| 1 | -4.042668 | 2.179619  | 2.108121  |
| 1 | -3.922704 | -0.261635 | 3.195210  |
| 1 | 4.448591  | -0.860018 | -3.653269 |
| 1 | 2.186357  | 1.755413  | -4.225613 |
| 6 | -1.781483 | -2.324197 | -3.929947 |
| 6 | -2.923892 | -3.256759 | -3.505188 |
| 1 | -2.816204 | -4.197268 | -4.055634 |
| 6 | -3.405251 | -4.526294 | -1.438990 |
| 6 | -2.870071 | -4.689336 | -0.020007 |
| 1 | -4.459549 | -4.235194 | -1.435308 |
| 1 | -3.304070 | -5.479286 | -1.982564 |
| 8 | -2.605055 | -3.522809 | -2.071201 |
| 8 | -1.087926 | -1.747589 | -3.009785 |
| 8 | -1.717519 | -4.210457 | 0.236861  |
| 6 | -2.307680 | -2.724248 | -6.323742 |
| 1 | -3.372251 | -2.776883 | -6.092218 |
| 1 | -1.921444 | -3.728243 | -6.538275 |
| 6 | -0.429082 | -1.248343 | -5.661977 |
| 1 | 0.111884  | -0.889988 | -4.789458 |
| 1 | -0.802773 | -0.398677 | -6.242102 |
| 7 | -1.558040 | -2.083950 | -5.232724 |
| 6 | -4.900005 | -5.963854 | 0.590324  |
| 1 | -4.980219 | -6.888991 | 1.165331  |
| 1 | -5.001130 | -6.217464 | -0.464820 |
| 6 | -3.130988 | -5.489167 | 2.270691  |
| 1 | -3.943392 | -5.192813 | 2.940551  |
| 1 | -2.262306 | -4.855903 | 2.435909  |
| 7 | -3.588998 | -5.349409 | 0.877916  |
| 1 | -2.193814 | -2.118242 | -7.224533 |
| 1 | 0.240114  | -1.835309 | -6.301506 |

---

---

|   |           |           |           |
|---|-----------|-----------|-----------|
| 1 | -2.877194 | -6.534581 | 2.471628  |
| 1 | -5.712363 | -5.295025 | 0.893695  |
| 6 | 1.185666  | -3.177692 | 2.131649  |
| 6 | 2.081641  | -4.168405 | 1.395786  |
| 1 | 2.077601  | -5.148522 | 1.880870  |
| 1 | 3.114864  | -3.785470 | 1.380161  |
| 6 | 2.390415  | -5.102026 | -0.868434 |
| 6 | 1.761469  | -4.790307 | -2.235805 |
| 1 | 3.415121  | -4.715277 | -0.873726 |
| 8 | 1.582344  | -4.262755 | 0.057814  |
| 8 | 0.459306  | -2.401203 | 1.428497  |
| 8 | 0.607626  | -4.220910 | -2.261525 |
| 6 | 2.103804  | -3.957351 | 4.292490  |
| 1 | 2.994848  | -4.268033 | 3.747114  |
| 1 | 1.565072  | -4.836719 | 4.660915  |
| 6 | 0.336492  | -2.211148 | 4.204247  |
| 1 | -0.403067 | -1.784090 | 3.530611  |
| 1 | 0.929913  | -1.414595 | 4.663641  |
| 7 | 1.220813  | -3.120787 | 3.456408  |
| 6 | 3.713419  | -5.792394 | -3.404860 |
| 1 | 3.807538  | -6.340172 | -4.344746 |
| 1 | 3.830311  | -6.508008 | -2.590899 |
| 6 | 1.835401  | -4.803895 | -4.680799 |
| 1 | 2.570554  | -4.215853 | -5.241535 |
| 1 | 0.921566  | -4.228845 | -4.551609 |
| 7 | 2.389493  | -5.153856 | -3.365918 |
| 1 | 2.427464  | -3.364810 | 5.151081  |
| 1 | -0.161775 | -2.776595 | 4.997057  |
| 1 | 1.623227  | -5.718082 | -5.244492 |
| 1 | 4.515591  | -5.045558 | -3.363683 |

---

---

|    |           |           |           |
|----|-----------|-----------|-----------|
| 90 | -0.347564 | -2.519052 | -0.868267 |
| 6  | 1.849485  | 1.835909  | -0.397020 |
| 7  | 1.752190  | 3.210353  | -0.433700 |
| 6  | 2.713505  | 3.751786  | 0.392645  |
| 6  | 0.829962  | 4.016928  | -1.240119 |
| 1  | 2.827503  | 4.818417  | 0.521283  |
| 1  | 1.006514  | 5.068503  | -1.012318 |
| 1  | 1.009436  | 3.863588  | -2.308490 |
| 1  | -0.210158 | 3.781551  | -0.999241 |
| 7  | 2.885512  | 1.543224  | 0.454576  |
| 6  | 3.413164  | 2.721770  | 0.943938  |
| 6  | 3.361947  | 0.183998  | 0.782615  |
| 6  | 4.418410  | 0.165331  | 1.883781  |
| 1  | 3.768894  | -0.252352 | -0.135521 |
| 1  | 2.484028  | -0.405584 | 1.071020  |
| 1  | 4.696854  | -0.874255 | 2.081225  |
| 1  | 5.333306  | 0.687112  | 1.588882  |
| 1  | 4.048553  | 0.595055  | 2.819675  |
| 1  | 4.239142  | 2.748602  | 1.635835  |
| 6  | -4.328054 | -2.797667 | -3.722721 |
| 7  | -5.305985 | -3.569357 | -4.311353 |
| 6  | -6.432063 | -2.798341 | -4.504264 |
| 6  | -5.201461 | -4.970104 | -4.734940 |
| 1  | -7.330421 | -3.194146 | -4.955453 |
| 1  | -6.168674 | -5.280421 | -5.131280 |
| 1  | -4.454832 | -5.083141 | -5.526619 |
| 1  | -4.951069 | -5.617426 | -3.890414 |
| 6  | -6.160688 | -1.546715 | -4.041053 |
| 7  | -4.864729 | -1.544672 | -3.564788 |
| 6  | -4.162036 | -0.381283 | -2.984771 |

---

---

|   |           |           |           |
|---|-----------|-----------|-----------|
| 6 | -5.065949 | 0.832664  | -2.789055 |
| 1 | -3.334865 | -0.128887 | -3.656414 |
| 1 | -3.729934 | -0.706051 | -2.031299 |
| 1 | -4.475481 | 1.636087  | -2.338440 |
| 1 | -5.453534 | 1.218449  | -3.736270 |
| 1 | -5.905450 | 0.620463  | -2.120015 |
| 1 | -6.790987 | -0.672741 | -4.021887 |
| 6 | 2.479336  | -6.531599 | -0.441850 |
| 7 | 3.621409  | -7.115408 | 0.059481  |
| 6 | 3.405600  | -8.468218 | 0.210757  |
| 6 | 4.902522  | -6.462432 | 0.352720  |
| 1 | 4.167366  | -9.133825 | 0.590161  |
| 1 | 5.581188  | -7.210683 | 0.763055  |
| 1 | 5.350891  | -6.057077 | -0.559172 |
| 1 | 4.776952  | -5.667485 | 1.092502  |
| 7 | 1.565252  | -7.541299 | -0.603777 |
| 6 | 0.196597  | -7.376526 | -1.136914 |
| 6 | -0.636117 | -8.653281 | -1.065049 |
| 1 | 0.288013  | -7.045151 | -2.176378 |
| 1 | -0.276888 | -6.567342 | -0.569194 |
| 1 | -1.634443 | -8.439141 | -1.458300 |
| 1 | -0.219284 | -9.455792 | -1.680265 |
| 1 | -0.752939 | -9.013964 | -0.038622 |
| 6 | 2.133232  | -8.732162 | -0.197248 |
| 1 | 1.605628  | -9.671525 | -0.227779 |

---



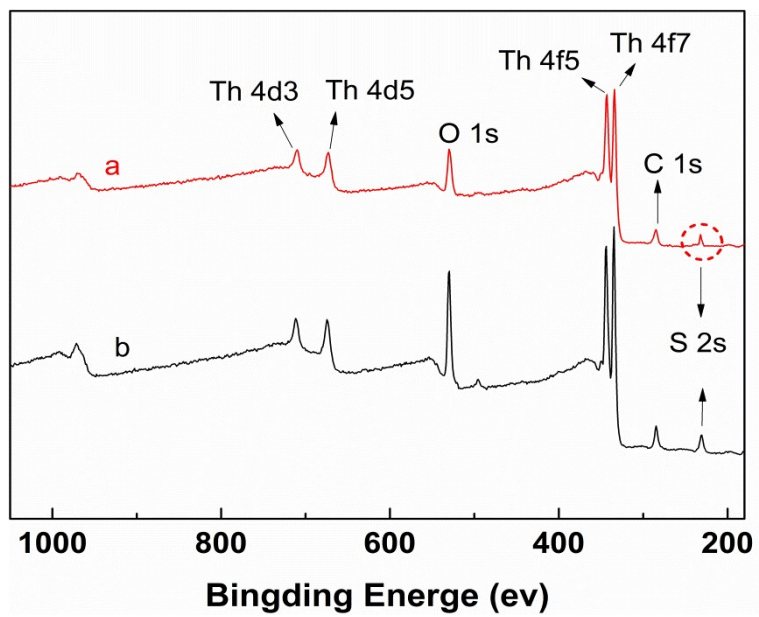

Fig.S1 XPS spectra of the sediment (a) and  $\text{Th}(\text{SO}_3)_2$  (b).

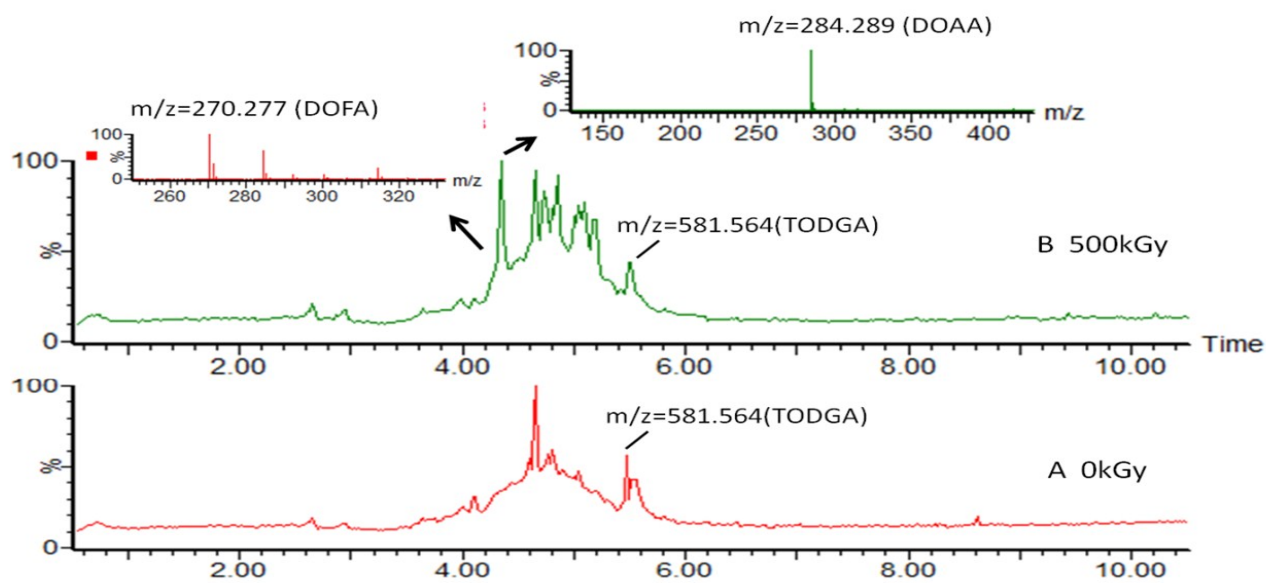

Fig.S2 UPLC/Q-TOF-MS spectra of TODGA/dodecane before (A) and after irradiation (B).

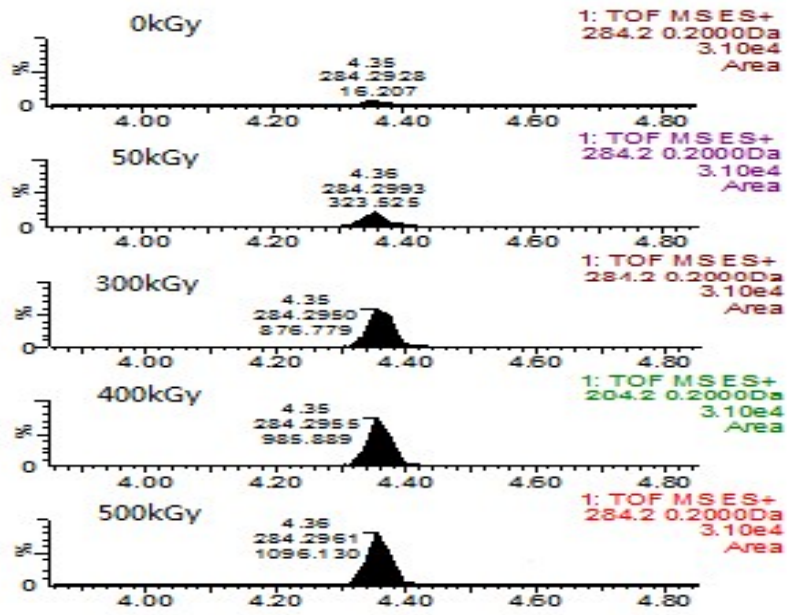

Fig.S3The area of extracted-ion peak of DOAA measured by UPLC/Q-TOF-MS

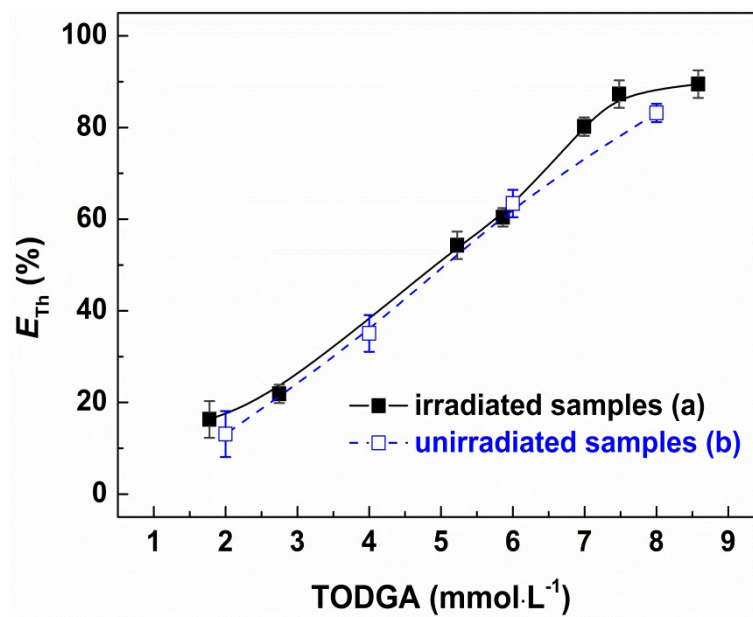

Fig.S4 Extraction of  $\text{Th}^{4+}$  using irradiated TODGA/dodecane (a) or unirradiated samples (b).

([TODGA] in irradiated TODGA/dodecane was detected by UPLC-Q-TOF-MS)
